# Supplementary material for: Nonprecious mixed oxide catalysts Co3AlO and Co2NiAlO derived from nanoflowerlike cobalt-based hydrotalcites for highly efficient oxidation of nitric oxide
Source: Royal Society of Chemistry journal article supplement (doi:10.1039/c6ra23704e), 2016-01-01
Supplement: c6ra23704e1.pdf [file c6ra23704e1.pdf]

## **Electronic Supplementary Information**

**Nonprecious mixed oxide catalysts  $\text{Co}_3\text{AlO}$  and  $\text{Co}_2\text{NiAlO}$  derived from nanoflowerlike cobalt-based hydrotalcites for highly efficient oxidation of nitric oxide**

**Ting Fan, Liguang Dou and Hui Zhang\***

*State Key Laboratory of Chemical Resource Engineering, Beijing University of Chemical Technology, Beijing 100029, P. R. China.*

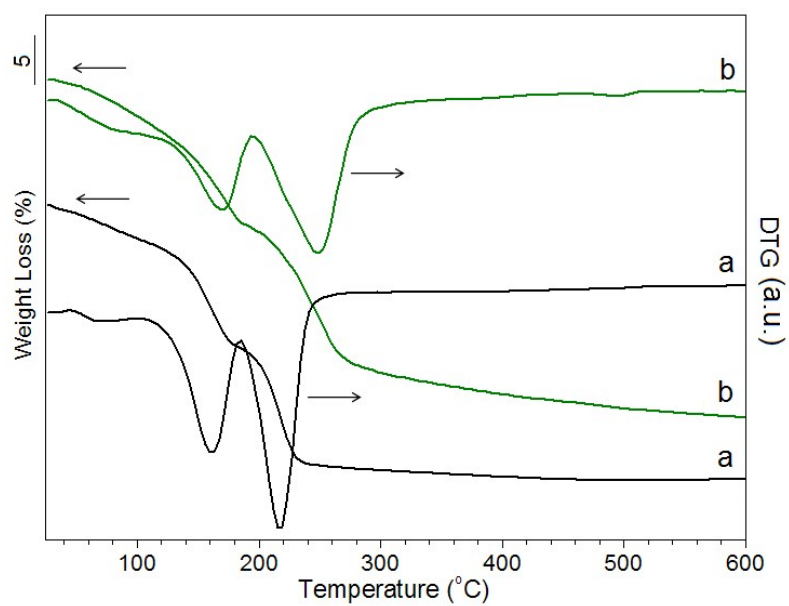

**Figure S1** TG/DTG profiles of the hydrotalcite precursors Co<sub>3</sub>Al-HT (a) and Co<sub>2</sub>NiAl-HT (b).

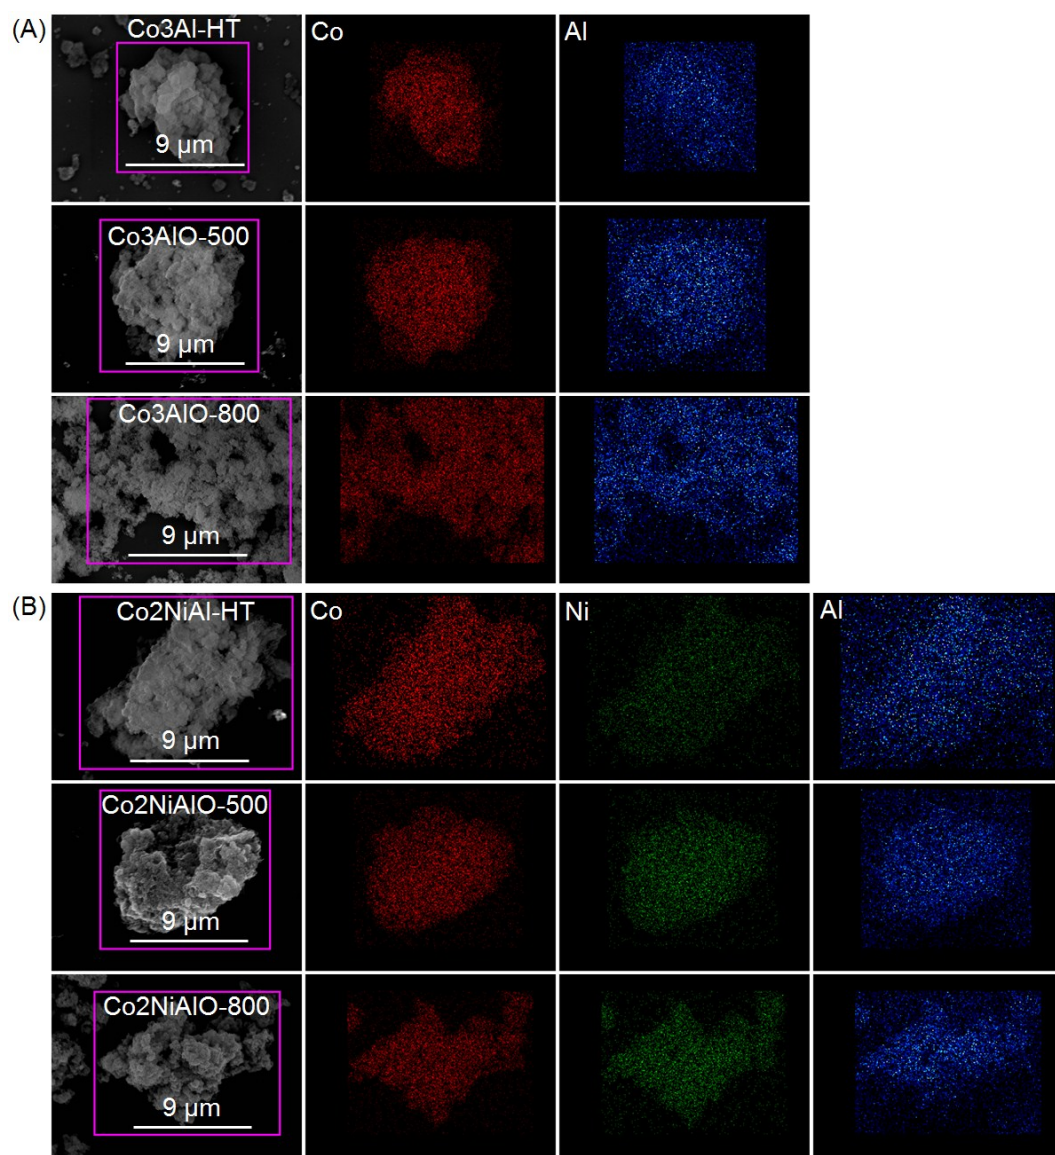

**Figure S2** Mapping of (A) the hydrotalcite precursor Co<sub>3</sub>Al-HT and the catalysts Co<sub>3</sub>AlO-500 and Co<sub>3</sub>AlO-800 and (B) the precursor Co<sub>2</sub>NiAl-HT and the catalysts Co<sub>2</sub>NiAlO-500 and Co<sub>2</sub>NiAlO-800.

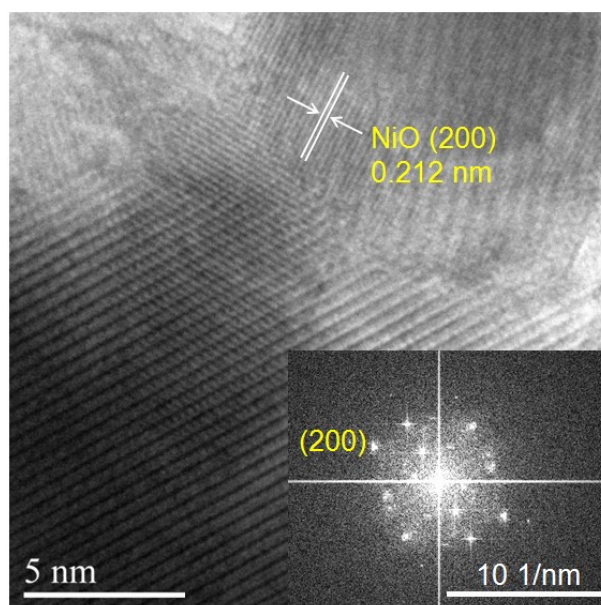

**Figure S3** HRTEM lattice image and corresponding fast Fourier transform (FFT) pattern (inset) of Co<sub>2</sub>NiAlO-800.

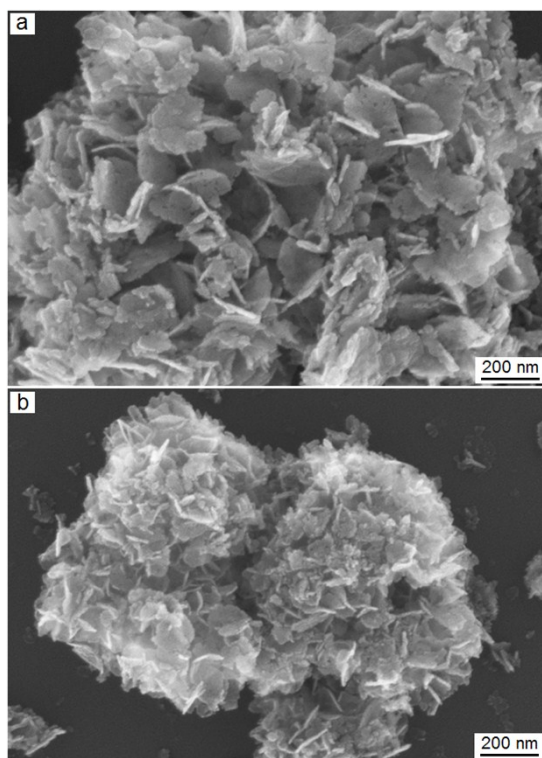

**Figure S4** SEM images of the used catalysts Co<sub>3</sub>AlO-500-u (a) and Co<sub>2</sub>NiAlO-500-u (b) after the stability tests.

**Table S1** Crystal structure parameters of the hydrotalcite precursors Co3Al-HT and Co2NiAl-HT

| Samples    | $d_{003}/nm$ | $d_{110}/nm$ | $D_{003}/nm^a$ | $D_{110}/nm^a$ |
|------------|--------------|--------------|----------------|----------------|
| Co3Al-HT   | 0.76         | 0.1535       | 10.30          | 16.82          |
| Co2NiAl-HT | 0.75         | 0.1525       | 7.98           | 15.17          |

<sup>a</sup> Upon the Scherrer formula  $D = 0.89\lambda/(\beta \cos\theta)$  ( $\lambda$  is the X-ray wavelength (0.1542 nm),  $\theta$  is the diffraction angle and  $\beta$  is the full width at half maximum (in radian))

**Table S2** The calculated results of the apparent activation energy ( $E_a$ ) and pre-exponential factor ( $A$ ) of the catalysts Co3AlO-500 and Co2NiAlO-500

| Temperature (°C) | Conversion (%) | Rate (mol g <sup>-1</sup> s <sup>-1</sup> ) |
|------------------|----------------|---------------------------------------------|
| 150              | 6.92           | 4.29×10 <sup>-8</sup>                       |
| 160              | 8.13           | 5.04×10 <sup>-8</sup>                       |
| 170              | 9.50           | 5.89×10 <sup>-8</sup>                       |
| 180              | 11.51          | 7.14×10 <sup>-8</sup>                       |
| 190              | 14.24          | 8.83×10 <sup>-8</sup>                       |

Catalyst Co3AlO-500: Apparent activation energy  $E_a$ = 29.12 kJ/mol

Pre-exponential factor  $A$  = 19.44 mol g<sup>-1</sup> s<sup>-1</sup>

| Temperature (°C) | Conversion (%) | Rate (mol g <sup>-1</sup> s <sup>-1</sup> ) |
|------------------|----------------|---------------------------------------------|
| 150              | 8.93           | 5.54×10 <sup>-8</sup>                       |
| 160              | 10.75          | 6.67×10 <sup>-8</sup>                       |
| 170              | 12.84          | 7.96×10 <sup>-8</sup>                       |
| 180              | 15.43          | 9.57×10 <sup>-8</sup>                       |
| 190              | 18.65          | 11.57×10 <sup>-8</sup>                      |

Catalyst Co2NiAlO-500: Apparent activation energy  $E_a$ = 29.84 kJ/mol

Pre-exponential factor  $A$  = 18.39 mol g<sup>-1</sup> s<sup>-1</sup>

The apparent activation energy  $E_a$  and pre-exponential factor  $A$  were obtained by the Arrhenius plot of  $\ln k$  vs ( $-1/T$ ). Reaction rate constant  $k$  was calculated from reaction rate  $r = k P_{NO}^a P_{O_2}^b$ , where  $a$  and  $b$  were the reaction orders determined from Figure 8 (D and E).
